# Supplementary material for: A redox-reversible A/B-site co-doped BaFeO3 electrode for direct hydrocarbon solid oxide fuel cells
Source: Royal Society of Chemistry journal article supplement (doi:10.1039/d4ta01957a), 2024-01-01
Supplement: d4ta01957a1.pdf [file d4ta01957a1.pdf]

## Supporting Information

### **A Redox-Reversible A/B-site Co-doped BaFeO<sub>3</sub> Electrode for Direct Hydrocarbon Solid Oxide Fuel Cells**

*Haixia Li,<sup>a</sup> Wanhua Wang,<sup>a</sup> Kai Zhao,<sup>a</sup> Ka-Young Park,<sup>a</sup> Taehee Lee,<sup>a</sup> Ramin Babazadeh Dizaj,<sup>a</sup> Andreas Heyden,<sup>b</sup> Dong Ding,<sup>c\*</sup> and Fanglin Chen<sup>a\*</sup>*

a Department of Mechanical Engineering, University of South Carolina, Columbia, SC, 29208, USA

b Department of Chemical Engineering, University of South Carolina, Columbia, SC, 29201, USA

c Energy & Environmental Science and Technology, Idaho National Laboratory, Idaho Falls, ID, 83401, USA

\* Corresponding author. E-mail: dong.ding@inl.gov; chenfa@cec.sc.edu

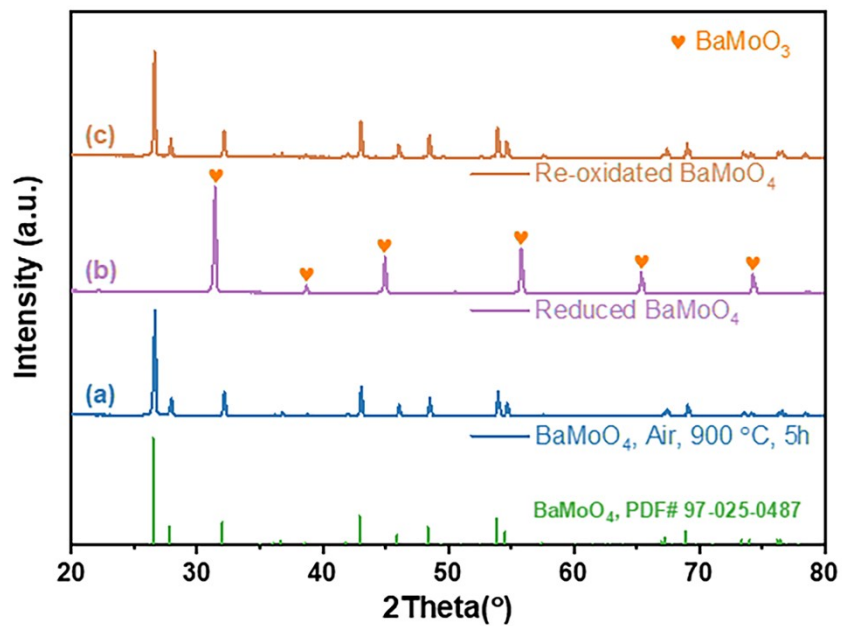

**Fig. S1** X-ray diffraction patterns of (a) as-prepared BMO<sub>4</sub>, (b) BMO<sub>4</sub> reduced in H<sub>2</sub> at 800 °C for 5 h, and (c) reduced BMO<sub>4</sub> being re-oxidated at 800 °C for 5 h in air.

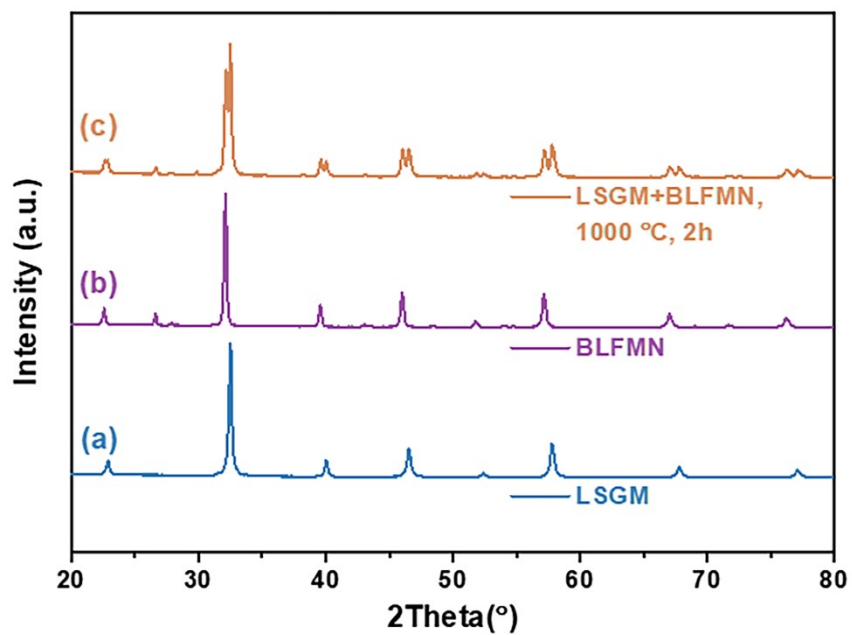

**Fig. S2** Compatibility (c) of LSGM (a) and BLFMN (b) electrolyte powder heat-treated at 1000 °C for 2h in air.

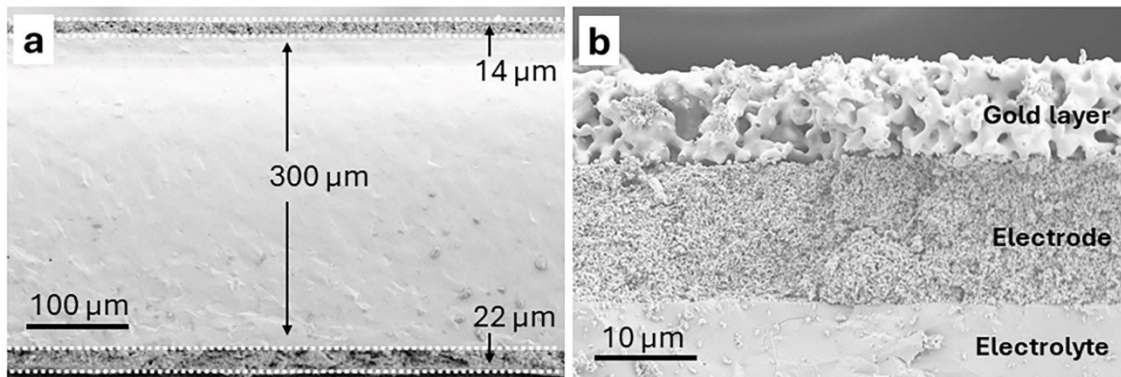

**Fig. S3** (a) SEM images of the cross-section of the electrolyte support single cells with BLFMN as the anode (22 μm) and LSCF as cathode (14 μm), (b) three-layered structure of the cell including electrolyte, electrode and gold current collector layer.

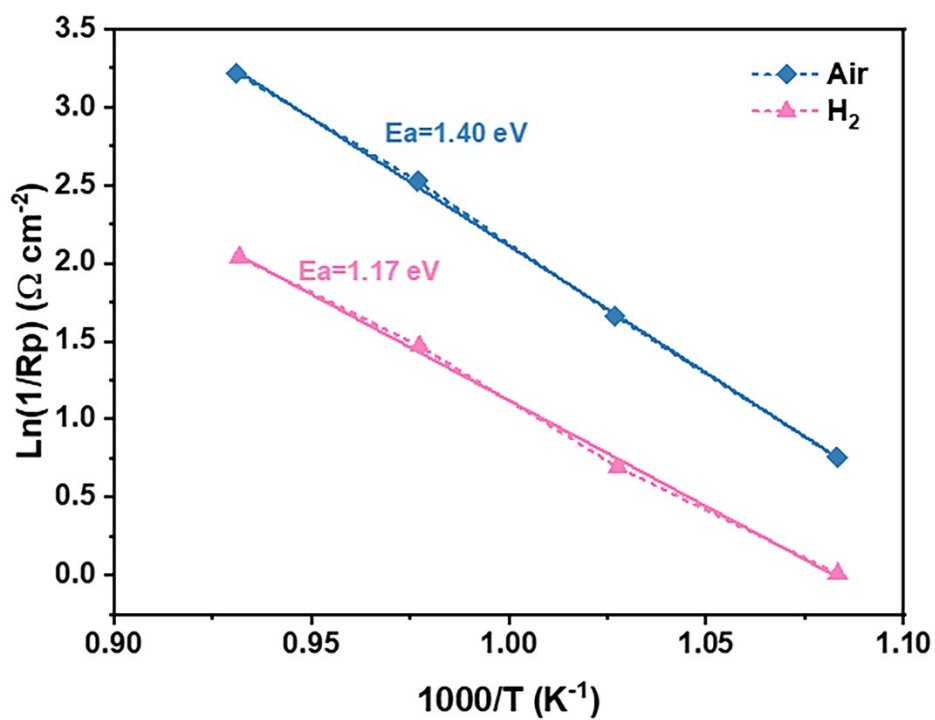

**Fig. S4** Arrhenius plot of ASR of BLFMN symmetric cells measured in air and  $\text{H}_2$  as a function of the operating temperature.

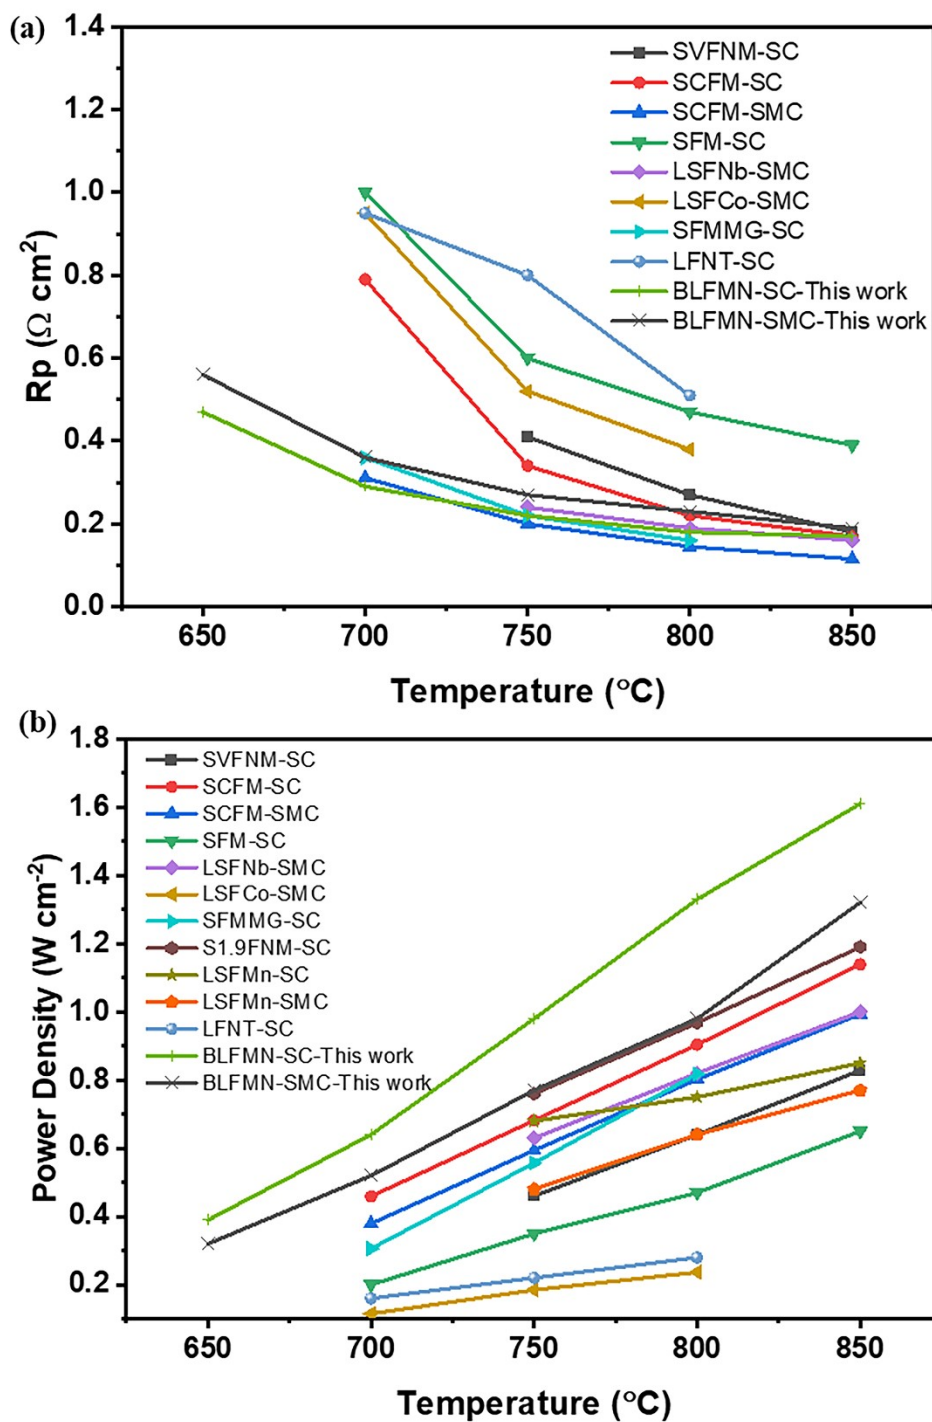

**Fig. S5** Comparison of Rp and power density for part of the reported electrodes listed in Table 2 at the temperature range of 650-850 $^{\circ}\text{C}$ .

**Table S1**  $R_{\Omega}$ ,  $R_p$  and  $P_{\max}$  values for BLFMN single cell and symmetric cell test at 650-850 °C.

| T<br>(°C) | Single Cell                            |                                 |                                   | Symmetric Cell                         |                                 |                                   |
|-----------|----------------------------------------|---------------------------------|-----------------------------------|----------------------------------------|---------------------------------|-----------------------------------|
|           | $R_{\Omega}$ ( $\Omega \text{ cm}^2$ ) | $R_p$ ( $\Omega \text{ cm}^2$ ) | $P_{\max}$ ( $\text{W cm}^{-2}$ ) | $R_{\Omega}$ ( $\Omega \text{ cm}^2$ ) | $R_p$ ( $\Omega \text{ cm}^2$ ) | $P_{\max}$ ( $\text{W cm}^{-2}$ ) |
| 850       | 0.12                                   | 0.16                            | 1.61                              | 0.13                                   | 0.19                            | 1.32                              |
| 800       | 0.14                                   | 0.18                            | 1.33                              | 0.17                                   | 0.23                            | 0.93                              |
| 750       | 0.18                                   | 0.22                            | 0.98                              | 0.22                                   | 0.27                            | 0.77                              |
| 700       | 0.25                                   | 0.29                            | 0.64                              | 0.30                                   | 0.36                            | 0.52                              |
| 650       | 0.37                                   | 0.47                            | 0.39                              | 0.42                                   | 0.56                            | 0.32                              |
